# Supplementary material for: Relating soil physical properties to other soil properties and crop yields
Source: Research Square preprint supplement (doi:10.21203/rs.3.rs-1627501/v1), 2022-05-16
Supplement: Supplementary file 1 [file 8db1dfe73fe2556d96cf8aad.xlsx]

## Sheet: Froid
Soil properties and crop yield in Froid, Montana, USA
PN	Trt	Rep	GY	Sand	Silt	Clay	AS	WSA	DSIS	WSIS	ASS	SV	SM	BD	MAP	MEP	TS	VWCFM	VWCWS	VWC0.3	VWC10	VWC33	VWC1500	RAWHC	IAWHC	SHC	PH	BPH	EC	Al	As	B	Ba	Ca	Cd	CO	Cr	Cu	Fe	K	Mg	Mn	Na	SAR	Ni	IP	OP	Pb	S
2	FSTCW	1	1.99	66.8	21.0932	12.1068	16.1432	54.4892	0.694915	0.384037	0.391488	0	0	1.34394	0.0296023	0.268103	10.4697	0.184678	0.503912	0.47431	0.319441	0.206207	0.0738833	0.245558	0.141661	4.58639	4.94	6.9	0.135	507.816	0.118	0.27606	25.2812	1006.96	0.21075	0.72814	0.5	0.78017	128.467	368.136	142.044	95.9113	5.25605	0.0432797	1.71754	96.2522	6.7	1.23043	11.4878
4	NTWP	1	1.39	66.8	19.7551	13.4449	14.3865	54.6012	0.859844	0.345269	0.308575	1.39535	22.17	1.40357	0.0162329	0.241902	3.13509	0.203388	0.433513	0.41728	0.312437	0.175379	0.0751939	0.237243	0.109547	3.5803	5.74	6.9	0.157	509.862	0.11256	0.29689	25.2021	1321.18	0.16258	0.67775	0.5	1.01894	109.843	250.194	234.066	80.411	5.25605	0.0510669	2.03234	81.5266	7	1.11984	11.0077
6	NTCW	1	1.51	76.7	12.4676	10.8324	18.1207	59.8784	0.90747	0.403144	0.479791	0.620155	9.44	1.45082	0.0192496	0.187602	5.71902	0.26199	0.436542	0.417292	0.295114	0.22969	0.0651445	0.22997	0.151552	2.48224	4.99	6.9	0.0935	521.927	0.06737	0.38093	26.7445	1029.78	0.1994	0.59984	0.60106	0.91049	129.785	271.583	145.427	83.1512	5.25605	0.0503522	1.68179	102.855	7.1	1.18777	11.7155
7	STWF	1	1.3	72.2	17.796	10.004	10.0966	45.9375	1.00183	0.338498	0.222918	1.39535	21.84	1.57585	0.0171666	0.185653	2.68622	0.197734	0.36781	0.350643	0.302444	0.16499	0.0629573	0.239487	0.102896	6.27541	5	6.9	0.057	466.354	0.07039	0.25674	24.873	894.45	0.13674	0.56298	0.5	0.87694	109.821	182.733	141.697	67.0244	5.25605	0.0559384	1.42555	63.3111	7.4	0.90068	7.97177
8	NTWP	2	1.51	74.4	15.9783	9.62172	13.4922	51.2903	0.919591	0.332677	0.279879	0.310078	5.93	1.54653	0.0191053	0.216209	2.57957	0.237543	0.383062	0.363957	0.249084	0.147748	0.0561147	0.192969	0.0987216	5.40997	4.64	6.9	0.0918	502.957	0.10665	0.21216	19.1073	700.905	0.16043	0.50157	0.5	0.71698	138.848	222.981	116.694	67.9051	1.40966	0.0489203	1.35233	118.97	10.2	0.96746	18.5411
9	STWF	2	1.47	69.1	20.3862	10.5138	9.84694	48.7879	0.651566	0.286331	0.222062	0.310078	4.1	1.50069	0.0167125	0.22594	3.95632	0.220797	0.418454	0.401742	0.308249	0.175802	0.0610935	0.247155	0.112059	1.55008	5	6.9	0.0844	467.74	0.07976	0.20463	22.4668	924.332	0.15093	0.54947	0.5	0.88367	109.389	234.784	132.442	70.3	1.57445	0.050314	1.5047	68.9322	7.1	0.87193	20.0058
12	FSTCW	2	1.51	65.9	21.7383	12.3617	16.1548	55.2381	0.782473	0.363111	0.273851	1.55039	34.55	1.44557	0.0159835	0.24263	3.37198	0.194999	0.444022	0.428038	0.272741	0.185409	0.0676553	0.205086	0.137418	6.773	4.8	6.9	0.1193	513.88	0.09374	0.29159	24.4212	1019.12	0.20885	0.71399	0.5	0.87508	139.122	295.852	140.319	103.53	5.25605	0.0566592	1.6533	93.9261	7.6	1.28663	12.6229
14	NTCW	2	1.76	62.1	24.71	13.19	15.6273	61.8497	0.812829	0.365368	0.32232	0.0775194	2.72	1.33528	0.021225	0.211924	7.21117	0.217149	0.442134	0.420909	0.311156	0.208985	0.070505	0.240651	0.17616	4.18485	4.81	6.9	0.1148	580.843	0.13021	0.30098	30.1622	1088.87	0.23951	0.62273	0.5	1.10261	142.994	339.949	163.569	96.9962	5.25605	0.0437749	2.0694	91.3791	7	1.34043	15.2337
16	NTCW	3	2.26	62.9	23.9737	13.1263	10.8057	54.491	1.01091	0.426917	0.33528	1.55039	26.2	1.26949	0.0394706	0.232669	14.307	0.278718	0.503423	0.463953	0.337922	0.231284	0.075743	0.262179	0.161922	3.60915	4.97	6.8	0.1005	579.94	0.09369	0.29545	29.6624	1111.92	0.21055	0.62664	0.5	1.11265	141.063	310.457	157.466	82.2728	5.25605	0.0445073	1.98216	84.3103	6.3	1.32439	13.9964
18	NTWP	3	1.34	65.3	21.4462	13.2538	18.633	58.7156	0.88846	0.434656	0.341015	1.55039	25.66	1.52941	0.0190584	0.205195	3.11834	0.275076	0.420554	0.401496	0.301458	0.196301	0.074126	0.227332	0.119732	2.80215	5.21	6.9	0.1178	517.319	0.09889	0.45234	24.8847	1317.49	0.17631	0.65265	0.65897	1.04567	117.301	319.119	204.806	79.7951	2.82503	0.0563761	1.91549	83.6943	7.8	1.19789	13.5553
20	FSTCW	3	1.77	66.3	20.1276	13.5724	17.0124	58.6826	1.12273	0.510254	0.3328	1.39535	24.06	1.4711	0.0153284	0.184579	3.12735	0.247808	0.460809	0.44548	0.262218	0.260901	0.0655281	0.19669	0.168007	9.28579	5.06	6.9	0.115	504.108	0.11449	0.3553	26.4186	1178.82	0.18745	0.72984	0.5	0.96808	114.704	274.843	206.855	89.2465	2.87569	0.0676351	2.08621	79.1525	7	1.24173	10.8862
21	STWF	3	1.59	65.8	20.1179	14.0821	12.4077	51.0448	1.13601	0.341502	0.238565	2.32558	34.76	1.53586	0.0243366	0.233956	4.81794	0.186905	0.455582	0.431245	0.328999	0.197289	0.0793936	0.249605	0.114827	2.22785	5.8	7.2	0.094	446.716	0.12012	0.29864	26.5293	1418.76	0.1423	0.76686	0.5	1.1098	87.4413	271.929	226.123	82.6115	2.23301	0.0471947	1.91612	57.1421	7.1	1.11205	8.28047
23	STWF	4	1.64	67.4	19.41	13.19	18.3237	56.7164	0.970244	0.337858	0.247263	0.775194	11.8	1.52	0.0244595	0.238399	4.98435	0.239377	0.474189	0.449729	0.352725	0.21133	0.0820852	0.27064	0.106486	1.70972	5.45	6.9	0.0851	459.632	0.13444	0.24139	25.5857	1204.12	0.15818	0.65835	0.5	1.01178	101.129	272.255	175.919	77.8658	1.85696	0.0425288	1.82003	64.7299	6.9	1.01756	8.24397
26	FSTCW	4	1.81	68	19.7658	12.2342	16.1606	56.9182	0.807838	0.421198	0.350846	0.775194	15.63	1.35419	0.021778	0.250447	3.30477	0.22963	0.480397	0.458619	0.290588	0.208172	0.0718736	0.218714	0.158191	4.71987	4.77	6.9	0.1389	511.276	0.11919	0.2694	20.0232	892.359	0.19709	0.6885	0.5	0.75642	142.403	315.112	138.904	95.2581	1.98735	0.062072	1.60019	100.337	7.5	1.32599	13.5384
27	NTCW	4	1.88	65.7	21.556	12.744	20.5081	58.982	0.989536	0.516696	0.412811	0.155039	3.57	1.40396	0.0311183	0.23047	5.63768	0.249595	0.462237	0.431118	0.260563	0.200648	0.0691691	0.191394	0.137188	9.14687	4.67	6.8	0.0983	562.864	0.08826	0.2642	23.8499	911.944	0.20308	0.55383	0.5	0.92981	149.306	272.814	136.531	85.0073	1.66672	0.0440716	1.7674	105.478	8.1	1.27212	14.8635
28	NTWP	4	1.5	67.5	19.6286	12.8714	17.478	62.0061	0.857378	0.486108	0.382251	0.310078	7.58	1.41334	0.0293564	0.209366	5.50436	0.226141	0.436797	0.407441	0.311803	0.198075	0.0759119	0.235891	0.123436	14.0549	6.25	7.2	0.2	455.812	0.16558	0.48588	22.7167	1596.56	0.19344	0.65466	0.51118	1.00666	112.421	338.244	201.464	80.4821	2.3647	0.0421825	1.61282	105.738	9.1	1.30958	13.583
	Abbreviations for Agronomics Soil Health
	PN = Plot No.
	Trt = Treatment
	Rep = Replication
	GY = Grain yield
	Sand = Sand conc.
	Silt = Silt conc.
	Clay = clay conc.
	As = Aggregate stability
	WSA = Water-stable aggregates
	DSIS = Dry soil stability index
	WSIS = Wet soil stability index
	ASS = Average slake aggregate
	SV = Stone volume
	SM = Stone mass
	BD = Bulk density
	MAP = Macroporosity
	MEP = Mesoporosity
	TS = Total shrinkage
	VWCFM = Volumetric water content in the field-moist soil
	VWC0.3 = Volumetric water content at 0.3 kPa
	VWC10 = Volumetric water content at 10 kPa
	VWC33 = Volumetric water content at 33 kPa
	VWC1500 = Volumetric water content at 1500 kPa
	RAWHC = Repacked core available water holding capacity
	IAWHC = Intact core available water hilding capacity
	SHC = Saturated hydraulic conductivity
	PH = Soil pH
	BPH = Buffer pH
	EC = Electrical conductivity
	Al = Al conc.
	B = B conc.
	Ba = Ba conc.
	Ca = Ca conc.
	Cd = Cd conc.
	Co = Co conc.
	Cr = Cr conc.
	Cu = Cu conc.
	Fe = Fe conc.
	K = K conc.
	Mg = Mg conc.
	Mn = Mn conc.
	Na = Na conc.
	SAR = Na absorption ratio
	Ni = Ni conc.
	IP = Inorganic P conc.
	OP = Organic P conc.
	Pb = Pb conc.
	S = S conc.
	Zn = Zn conc
	TC = Total C
	SOM = Soil organic matter
	TN = Total N
	WEON = Water-extractable organic N
	WETN = Water-extractable total N
	NH4 = NH4-N conc.
	NO3 = NO3-N conc.
	KMno4C = KMnO4-extractable C
	WEC = Water-extractable C
	MAC = Microbially active C
	CO2-1d = CO2 flush at 1-d incubation
	CO2-4d = CO2 flusd at 4-d incubation
	BG = β glucosidase
	PLFA = Phospholipid fatty acid
	ACEP = Autoclaved citrate-extractable protein
	PMN = Potentially mineralizable N
	NABG = N-acetyl β- glucosaminidase
	ARST = Arysulfatase
	PPME = Phosphomonoesterase
[truncated: 20 more columns]

## Sheet: Sidney
Soil properties and crop yield in Sidney, Montana, USA
PN	CS	NR	Rep	GY	Sand	Silt	Clay	AS	WSA	DSIS	WSIS	ASS	SV	SM	BD	MAP	MEP	TS	VWCFM	VWCWS	VWC0.3	VWC10	VWC33	VWC1500	RAWHC	IAWHC	SHC	PH	BPH	EC	Al	As	B	Ba	Ca	Cd	CO	Cr	Cu	Fe	K	Mg	Mn	Na	SAR	Ni	IP	OP	Pb
101	NTCW	N0	1	1.85	31.1	42.0102	26.8898	17.6527	52.7778	1.78005	0.810309	0.266911	20	50.38	1.30472	0.0289642	0.214069	13.5416	0.2427	0.51503	0.486066	0.453118	0.271997	0.123491	0.329627	0.156818	22.6396	7.22	7.2	0.1958	481.718	0.30447	0.99689	60.9479	3425.63	0.17486	1.76749	0.5	2.28836	46.1594	379.702	538.848	148.336	6.91983	0.0858103	2.67968	48.7726	3.6	2.22963
101	NTCW	N100	1	3.02	27.1	46.265	26.635	17.125	56.25	1.77177	0.675598	0.295868	6	14.89	1.3436	0.0247909	0.178429	10.918	0.279223	0.489293	0.464503	0.416897	0.286074	0.11545	0.301447	0.172636	5.89644	6.87	7.2	0.17	496.128	0.20138	0.79613	62.9607	2789.47	0.20895	1.71535	0.5	1.88535	57.0128	316.867	522.328	158.45	7.32313	0.0861112	2.36903	44.8486	3.9	2.16694
102	NTWP	N0	1	2.34	25.6	46.1083	28.2917	13.5589	60.6469	1.63178	0.453498	0.247055	6	17.02	1.2027	0.0408282	0.251197	16.2088	0.166081	0.575746	0.534918	0.424425	0.283721	0.127433	0.296992	0.174517	10.2545	6.13	7	0.0857	567.07	0.11306	0.58976	68.5623	2392.78	0.2031	1.19879	0.5	1.80605	73.5834	321.324	554.041	115.83	7.77987	0.106825	2.45639	47.6033	3.8	1.90217
102	NTWP	N100	1	2.64	30.9	42.2102	26.8898	20.3995	53.6193	1.40744	0.510616	0.258514	7	16.41	1.26106	0.0258237	0.247974	9.05425	0.218177	0.529716	0.503893	0.344836	0.255919	0.116393	0.228443	0.14831	3.40299	7.34	7.2	0.1832	420.115	0.30389	1.02493	59.0461	3839.92	0.18192	1.71213	0.5	2.25952	43.7551	343.978	505.57	146.211	7.74197	0.09368	2.57672	44.1617	4.2	2.17469
103	NTWF	N100	1	1.98	23.8	47.9083	28.2917	16.0209	42.5134	1.65847	0.368409	0.216684	10	22.39	1.2876	0.0287294	0.167479	9.84459	0.266073	0.492317	0.463588	0.476442	0.296109	0.135699	0.340743	0.160984	2.13342	6.01	7	0.1281	573.987	0.12959	0.54562	66.1568	2273.18	0.20268	1.14013	0.5	1.85324	77.2554	337.353	554.857	110.123	6.75857	0.0867004	2.41453	41.5927	4.5	1.77456
103	NTWF	N0	1	1.68	28	44.473	27.527	16.7382	44.3526	1.78064	0.435619	0.207859	10	24.75	1.33087	0.0266695	0.153837	9.90693	0.263117	0.481351	0.454682	0.490611	0.300845	0.137465	0.353145	0.150194	4.85629	6.94	7.2	0.1853	506.416	0.21014	0.96803	61.1945	2946.73	0.18516	1.84104	0.82543	2.13928	53.7649	324.689	548.212	156.088	8.53312	0.0882821	2.75556	43.9992	3.5	2.27537
104	CTWF	N0	1	1.8	24.9	47.3818	27.7182	18.5132	45.8791	1.3755	0.378614	0.159878	13	29.74	1.26319	0.029148	0.206983	9.25139	0.268882	0.505995	0.476847	0.446983	0.269864	0.126298	0.320684	0.132113	3.7675	7.33	7.2	0.201	487.436	0.29076	0.78665	67.6172	3836.65	0.19766	1.48265	0.5	2.02485	50.7284	400.973	532.179	147.168	6.75287	0.0792788	2.22333	48.9376	4.5	2.0814
104	CTWF	N100	1	2.01	31.7	42.6208	25.6792	15.9961	45.098	1.33547	0.343346	0.092509	10	24.55	1.3388	0.0239129	0.18508	10.6459	0.260094	0.492344	0.468431	0.467259	0.283352	0.124769	0.342491	0.149072	10.5064	7.4	7.2	0.211	475.042	0.33889	0.9331	60.1532	3629.49	0.17509	1.73993	0.5	2.31968	46.0375	327.804	512.692	152.073	8.27848	0.0975734	2.66731	34.6734	4.3	2.13481
201	NTWP	N0	2	2.28	24.2	47.8906	27.9094	19.3116	46.4286	1.52396	0.464166	0.164431	8	18.61	1.16579	0.0423984	0.2588	11.1643	0.21708	0.562711	0.520313	0.441616	0.261513	0.127167	0.314449	0.145531	2.49026	6.06	7	0.0905	558.421	0.12315	0.6181	64.5377	2292.97	0.23313	1.00665	0.5	1.84593	84.0225	409.438	530.057	106.323	5.93844	0.0745386	2.53862	59.7764	5.9	1.85682
201	NTWP	N100	2	3.05	23.7	46.6065	29.6935	16.5809	43.6314	1.44676	0.407775	0.207736	9	19.46	1.24194	0.0275412	0.193436	6.28696	0.244306	0.490233	0.462691	0.438491	0.269255	0.133841	0.304651	0.150669	2.56602	5.75	7.2	0.0924	593.602	0.13305	0.52117	66.8351	2218.17	0.25331	0.83723	0.5	1.88379	94.6345	427.93	524.26	93.693	5.10926	0.064439	2.72792	68.3769	6.8	1.84449
203	NTWF	N100	2	2.04	27.4	44.1809	28.4191	13.0877	42.2969	1.76091	0.480367	0.198852	10	25.59	1.22675	0.0386272	0.218444	12.8756	0.202127	0.530458	0.491831	0.440985	0.273387	0.125146	0.31584	0.149954	6.05895	5.69	6.9	0.1174	585.701	0.17518	0.53631	59.7603	2218.74	0.1871	0.9394	0.5	1.81093	84.3314	365.409	533.384	92.446	5.13885	0.065445	2.63663	45.8349	5.5	1.70786
203	NTWF	N0	2	1.66	28.7	44.4739	26.8261	18.2575	48.8636	1.63622	0.540207	0.215994	13	36.7	1.11336	0.0475738	0.281678	12.3612	0.192007	0.577389	0.529815	0.404101	0.248137	0.118354	0.285747	0.141766	3.66253	7.29	7.2	0.215	454.272	0.33643	0.91869	66.7382	3898.38	0.19501	1.716	0.5	2.06987	50.7344	468.479	530.315	152.39	5.09749	0.0532302	2.37477	56.5555	6.4	2.34106
205	NTCW	N100	2	2.97	30.4	44.2394	25.3606	22.2897	49.7143	1.74555	0.678048	0.283143	19	43.93	1.19338	0.0218321	0.215753	8.57854	0.222495	0.518513	0.496681	0.389792	0.280928	0.124702	0.26509	0.156548	8.11532	5.53	7.2	0.1176	578.029	0.17502	0.52621	62.8857	2203.41	0.21302	0.96177	0.5	1.66425	89.2506	368.576	506.064	100.895	5.06158	0.074971	2.54248	68.2181	5.3	1.83615
205	NTCW	N0	2	2.04	28.7	45.3022	25.9978	22.4091	54.0984	1.84363	0.75354	0.281764	10	26.05	1.18497	0.0328338	0.21539	11.4079	0.199629	0.532564	0.49973	0.381207	0.28434	0.124599	0.256608	0.155532	4.31252	6.09	7.2	0.1057	540.77	0.19644	0.57853	62.1439	2405.12	0.21986	0.97477	0.5	1.72188	84.2402	399.086	501.382	95.8682	4.86365	0.0693208	2.28253	72.33	6.4	1.79939
207	CTWF	N0	2	1.75	28.4	44.965	26.635	13.1161	49.0141	1.09035	0.31042	0.214484	8	19.4	1.21586	0.0322588	0.197543	9.07891	0.203862	0.51348	0.481221	0.446624	0.283678	0.13856	0.308065	0.138762	4.18628	5.58	7	0.1016	609.139	0.19175	1.02846	67.3278	2330.45	0.20666	0.99015	0.95176	1.91762	83.9591	328.989	577.275	99.2251	12.8856	0.11445	2.65078	53.8416	6.2	1.80214
207	CTWF	N100	2	2.1	29.6	44.8483	25.5517	19.3186	50.9804	1.18735	0.276611	0.234293	13	33.62	1.27073	0.0215378	0.174231	5.61482	0.249453	0.465474	0.443936	0.433653	0.269705	0.136637	0.297017	0.124076	2.09968	5.63	7	0.1054	556.022	0.11192	0.70968	59.3466	2145.82	0.20112	1.02322	0.52709	1.72419	81.8968	292.78	511.879	101.235	7.75605	0.102065	2.48647	53.1074	5.4	1.77892
302	NTWP	N0	3	1.97	33.3	43.3785	23.3215	17.8671	58.6705	1.1582	0.456876	0.216651	8	19.52	1.22194	0.0289735	0.255035	13.4611	0.211911	0.53601	0.507037	0.452956	0.252002	0.136162	0.316794	0.116956	1.13849	7.05	7.2	0.1614	454.004	0.28571	1.08802	57.9208	3099.98	0.19798	1.84776	0.5	2.23957	43.5284	297.706	538.534	165.659	6.7676	0.0777798	2.66794	54.4806	5.7	2.28521
302	NTWP	N100	3	2.6	31.4	43.0483	25.5517	18.3799	53.1073	1.22508	0.412141	0.240669	14	33.65	1.20152	0.0225407	0.215607	9.88658	0.22018	0.505042	0.482502	0.41597	0.266895	0.135636	0.280334	0.132425	6.8625	6.43	7.2	0.1376	506.468	0.27006	0.79076	62.0777	2762.28	0.20364	1.55881	0.5	1.99758	59.5915	300.716	540.574	134.072	6.8959	0.0807235	2.78117	53.301	5.9	2.17704
303	NTWF	N100	3	2.01	33.5	41.5218	24.9782	14.13	54.8387	0.96933	0.376466	0.143013	13	30.57	1.30016	0.0259442	0.205255	9.24684	0.264039	0.491297	0.465353	0.443358	0.260099	0.132709	0.310649	0.131687	2.19502	7.22	7.2	0.203	465.511	0.35182	1.10476	62.1101	3072.4	0.1866	1.96056	0.5	2.25957	41.5369	367.594	545.158	170.951	6.79441	0.0828107	2.84276	44.451	5.7	2.33774
303	NTWF	N0	3	1.81	32.7	42.5766	24.7234	18.1469	56.8681	1.08222	0.378845	0.287322	9	21.04	1.35071	0.0171262	0.167061	6.66779	0.272726	0.465638	0.448512	0.396141	0.281451	0.127791	0.26835	0.148689	2.21875	6.77	7.2	0.137	492.771	0.2205	0.78217	60.5872	2711.13	0.18245	1.74736	0.5	1.92184	54.0317	287.036	541.098	148.056	5.75647	.	2.63597	54.2743	5.7	2.23117
307	NTCW	N100	3	3.01	32.9	43.205	23.895	18.9077	50.6964	1.4109	0.613114	0.383893	6	18	1.22747	0.0204471	0.218102	9.75871	0.203172	0.50858	0.488133	0.391192	0.270031	0.107668	0.283524	0.153418	4.4168	5.95	7.2	0.101	543.393	0.17175	0.56147	59.1052	1991.73	0.22919	1.08692	0.5	1.50446	87.5823	417.644	485.209	107.436	4.72835	0.0666961	2.40973	83.1485	6.3	1.92861
307	NTCW	N0	3	1.72	32.8	43.1776	24.0224	22.6012	50.8333	1.31777	1.0879	0.336141	3	9.89	1.14814	0.0334674	0.284131	11.692	0.180314	0.568262	0.534795	0.390294	0.250664	0.110595	0.279699	0.147015	2.61607	5.87	7.2	0.102	535.719	0.13331	0.98041	56.2566	2033.79	0.21265	1.10289	0.89273	1.55168	85.7653	362.73	477.699	111.012	7.06065	0.0680618	2.44243	67.5582	6.4	1.97622
308	CTWF	N0	3	1.75	30.2	45.0766	24.7234	13.5409	52.4457	1.43082	0.332894	0.152763	5	11.04	1.29103	0.0199525	0.183171	7.07943	0.267887	0.471992	0.452039	0.431457	0.268868	0.124646	0.306811	0.139991	2.18965	5.77	7.2	0.0993	557.164	0.12973	0.72008	61.6522	2125.13	0.20382	1.18089	0.5	1.64965	77.996	350.688	519.534	115.99	6.13412	0.0781473	2.49614	51.0637	6	1.88172
308	CTWF	N100	3	1.95	30.9	43.9306	25.1694	15.4071	42.577	1.37285	0.364106	0.137712	10	26.44	1.25242	0.0305386	0.215112	11.4774	0.241959	0.516806	0.486268	0.408589	0.271156	0.12974	0.278849	0.141107	2.52328	5.6	7	0.1154	574.353	0.15256	0.48955	56.2843	2012.71	0.2035	0.91954	0.5	1.55294	89.2872	389.357	484.833	99.0483	5.53559	0.0600603	2.5696	55.7535	6.2	1.75209
Abbreviations for Gracenet Soil Health
PN = Plot No.
CS = Cropping system
NR = N fertilization rate
Rep = Replication
GY = Grain yield
Sand = Sand conc.
Silt = Silt conc.
Clay = clay conc.
As = Aggregate stability
WSA = Water-stable aggregates
DSIS = Dry soil stability index
WSIS = Wet soil stability index
ASS = Average slake aggregate
SV = Stone volume
SM = Stone mass
BD = Bulk density
MAP = Macroporosity
MEP = Mesoporosity
TS = Total shrinkage
VWCFM = Volumetric water content in the field-moist soil
VWC0.3 = Volumetric water content at 0.3 kPa
VWC10 = Volumetric water content at 10 kPa
VWC33 = Volumetric water content at 33 kPa
VWC1500 = Volumetric water content at 1500 kPa
RAWHC = Repacked core available water holding capacity
IAWHC = Intact core available water hilding capacity
SHC = Saturated hydraulic conductivity
PH = Soil pH
BPH = Buffer pH
EC = Electrical conductivity
Al = Al conc.
B = B conc.
Ba = Ba conc.
Ca = Ca conc.
Cd = Cd conc.
Co = Co conc.
Cr = Cr conc.
Cu = Cu conc.
Fe = Fe conc.
K = K conc.
Mg = Mg conc.
Mn = Mn conc.
Na = Na conc.
SAR = Na absorption ratio
Ni = Ni conc.
IP = Inorganic P conc.
OP = Organic P conc.
Pb = Pb conc.
S = S conc.
Zn = Zn conc
TC = Total C
SOM = Soil organic matter
TN = Total N
WEON = Water-extractable organic N
WETN = Water-extractable total N
NH4 = NH4-N conc.
NO3 = NO3-N conc.
KMno4C = KMnO4-extractable C
WEC = Water-extractable C
MAC = Microbially active C
CO2-1d = CO2 flush at 1-d incubation
CO2-4d = CO2 flusd at 4-d incubation
BG = β glucosidase
PLFA = Phospholipid fatty acid
ACEP = Autoclaved citrate-extractable protein
PMN = Potentially mineralizable N
NABG = N-acetyl β- glucosaminidase
ARST = Arysulfatase
PPME = Phosphomonoesterase
[truncated: 20 more columns]
